# Supplementary material for: Catalytic recycling of PET waste bottles into a value-added amide monomer using a heterogeneous niobium pentoxide nanocatalyst
Source: Royal Society of Chemistry journal article supplement (doi:10.1039/d4se01136h), 2024-01-01
Supplement: d4se01136h1.pdf [file d4se01136h1.pdf]

## Supporting Information

### **Catalytic recycling of PET waste bottles into a value-added amide monomer using a heterogeneous niobium pentoxide nanocatalyst**

Bhattu Swapna<sup>a</sup>, Suresh Babu Putla<sup>b</sup>, Asha Ramesh<sup>a</sup>, Challapalli Subrahmanyam<sup>a</sup>, Giridhar  
Madras<sup>c</sup>, Putla Sudarsanam<sup>\*,a</sup>

<sup>a</sup>Department of Chemistry, Indian Institute of Technology Hyderabad, Kandi 502284, Telangana,  
India

<sup>b</sup>Department of Energy and Environmental Engineering, CSIR- Indian Institute of Chemical  
Technology, Tarnaka, Hyderabad-500007, India

<sup>c</sup>Department of Chemical Engineering, Indian Institute of Technology Hyderabad, Kandi 502284,  
Telangana, India

\*Email: sudarsanam.putla@chy.iith.ac.in

## 1. Materials characterization studies

The bis(2-hydroxyethyl) terephthalamide (BHETA) obtained from PET aminolysis was qualitatively confirmed by  $^1\text{H}$ ,  $^{13}\text{C}$ , and DEPT 135° NMR analyses (Bruker Avance III 400 MHz/54mm FT-NMR spectrometer). To elucidate the crystal structure of  $\text{Nb}_2\text{O}_5$  materials, the powder X-ray diffraction (XRD) analysis was carried out on the Malvern PANalytical non-ambient XRD Empyrean-DY2584 (45 KW & 40 mA) instrument. The XRD data was collected in the  $2\theta$  range of 5–90° using Ni-filtered  $\text{Cu K}\alpha$  radiation as the X-ray source. The qualitative analysis of BHETA crystallites was also analyzed by the same powder XRD technique. A Bruker Alpha instrument (DTGS detector) was used for the FT-IR analysis (600 to 4000  $\text{cm}^{-1}$ ) of the BHETA monomer.

The thermogravimetry analysis (SDT Q600 TA instrument) was carried out to estimate the stability of the BHETA monomer from 50 to 800 °C (10 °C/min) under the  $\text{N}_2$  atmosphere. The differential scanning calorimetry (DSC) on the TA Q200 instrument was carried out to estimate the melting point of the BHETA product. The  $\text{NH}_3$ -temperature programmed desorption (TPD) analysis to estimate the strength and the concentration of acid sites in the  $\text{Nb}_2\text{O}_5$  catalysts was carried out on the Quantachrome autosorb-IQ instrument (TCD detector). The data was collected in the temperature range of 100–800 °C (10 °C  $\text{min}^{-1}$ ) after treating the  $\text{Nb}_2\text{O}_5$  catalysts under He flow for 1 h at 200 °C temperature and then  $\text{NH}_3$  adsorption with 5 vol% of  $\text{NH}_3/\text{He}$  (50  $\text{mL min}^{-1}$ ) for another 1 h.

To estimate the morphology/particle size of the  $\text{Nb}_2\text{O}_5$  catalysts, the transmission electron microscopy (TEM) analysis was conducted using the JEOL JEM F200 instrument (200 kV accelerating voltage). A carbon-coated copper grid (200 mesh size) was used to prepare TEM samples. The  $\text{N}_2$  adsorption-desorption analysis was conducted at -196 °C (liquid  $\text{N}_2$  temperature) using an Autosorb iQ Station 1 instrument. To determine the oxidation states of Nb and O in  $\text{Nb}_2\text{O}_5$  catalysts, X-ray photoelectron spectroscopy (XPS) analysis was conducted using an AXIS Supra instrument (Al  $\text{K}\alpha$  radiation). Raman analysis was performed for  $\text{Nb}_2\text{O}_5$  materials on a Horiba JY LabRAMHR800 instrument in the range of 100–1200  $\text{cm}^{-1}$  using a He–Ne laser (632.8 nm, 20 mW).

## 2. Molecular weight determination of PET aminolysis oligomers by viscometry studies

The Ubbelohde viscometer (size 1C) is used to estimate the molecular weight and intrinsic viscosity of PET and its aminolysis oligomers. Standard solutions were prepared with a 60:40 ratio of phenol to tetrachloroethane, containing various concentrations of the PET aminolysis reaction mixture, in a 10 ml solution of phenol and tetrachloroethane. These solutions are then passed through the viscometer to measure the liquid flow time, allowing for the calculation of relative viscosity, using  $\eta_0 = 1.24$  as a reference.

The relative viscosity ( $\eta_{rel}$ ) of the respective solution can be determined via  $\eta_{rel} = \eta/\eta_0 \sim t/t_0$  and the specific viscosity ( $\eta_{sp}$ ) is also estimated by using  $\eta_{sp} = \eta_{rel} - 1$ . This specific viscosity helps to find the intrinsic viscosity  $[\eta]$  of the reaction mixture as follows.

$[\eta] = ((1 + 4 \times \eta_{sp})^{1/2} - 1)/K^1$ , where  $K^1$  is the constant having value of 0.35 and Mark–Kuhn–Houwink (MKH) equation,  $[\eta] = KM^\alpha$  where  $K$  is  $2.1 \times 10^{-4}$  and  $\alpha$  is 0.82 as reported in the literature<sup>1-3</sup>.

The above procedure and equations are used to determine the intrinsic viscosity and molecular weight of PET and its oligomers. Various reaction mixtures, including pure PET flakes, a blank reaction (without a catalyst), and a reaction mixture with 1 wt%  $Nb_2O_5$  catalysts (calcined at different temperatures), were tested to determine the molecular weight.

The molecular weight of the PET sample from the bottle used in the reaction was found to be  $\sim 75000$  with an intrinsic viscosity  $[\eta]$  of 15.68 dL/g. The blank reaction indicated the cleavage of PET into oligomers with a molecular weight of  $\sim 21000$  having a 4.47 dL/g intrinsic viscosity. The molecular weights and intrinsic viscosity  $[\eta]$  of the oligomers obtained after the reaction in the presence of 1 wt%  $Nb_2O_5$ -400,  $Nb_2O_5$ -450, and  $Nb_2O_5$ -500 were  $\sim 3700$ , 1000, and 5000 with 0.78, 0.21, and 1.06 dL/g, respectively. This data clearly indicates the lower molecular weight of the oligomers when the reaction is conducted over an  $Nb_2O_5$ -450 catalyst. Thus, a higher yield of BHETA monomer (92%) with 8% of oligomer yield was obtained over the  $Nb_2O_5$ -450 catalyst (entry 3, Table 1).

### 3. MALDI-TOF analysis for PET aminolysis reaction mixture

The molecular weight of PET aminolysis oligomers is determined using MALDI TOF analysis.<sup>4,5</sup> For this, a MALDI-reTOF/TOF UltrafleXtreme instrument (Bruker Daltonics, Bremen, Germany) fitted with pulsed ion extraction, LIFT devices, and reflector lens was used.

The analysis confirms the mass of the oligomers by identifying the repeating PET unit, the BHETA monomer, and byproducts, such as ethanolamine, ethylene glycol, and water (Fig. S2). The fragmentation of the PET polymer using ethanolamine into the BHETA monomer was performed over the  $Nb_2O_5$ -450 catalyst. The fractions of BHETA oligomers were found to be 215 and 240 g/mol, and the BHETA monomer ( $C_{12}H_{16}O_4N_2$ ) molecular weights were confirmed to be around 240 and 259 g/mol, with water as a byproduct. Other oligomer molecular weights were also identified with higher  $m/z$  values at 270 and 346 g/mol, along with a few byproducts and minor fractions of other oligomers, indicated by low-intensity peaks. Thus, the MALDI-TOF analysis confirms that the PET polymer is converted into its respective monomers and oligomers via the aminolysis reaction in the presence of a  $Nb_2O_5$ -450 catalyst.

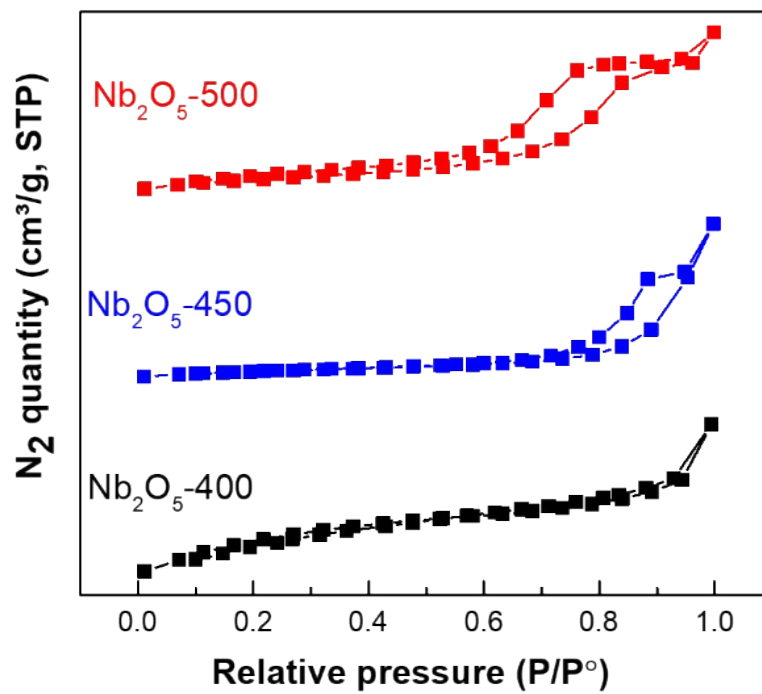

Fig. S1. N<sub>2</sub> adsorption-desorption isotherms of Nb<sub>2</sub>O<sub>5</sub> catalysts.

Table S1: BET surface area (BET SA), average pore size, and average pore volume of Nb<sub>2</sub>O<sub>5</sub> catalysts.

| Catalyst                            | BET SA (m <sup>2</sup> /g) | Average pore size (nm) | Average pore volume (cm <sup>3</sup> /g) |
|-------------------------------------|----------------------------|------------------------|------------------------------------------|
| Nb <sub>2</sub> O <sub>5</sub> -400 | 7                          | 0.5                    | 0.009                                    |
| Nb <sub>2</sub> O <sub>5</sub> -450 | 28                         | 2.1                    | 0.154                                    |
| Nb <sub>2</sub> O <sub>5</sub> -500 | 44                         | 3.8                    | 0.171                                    |

Table S2. Amount of acid sites estimated by NH<sub>3</sub>-TPD analysis of Nb<sub>2</sub>O<sub>5</sub> catalysts.

| S. No. | Catalyst                                   | Weak acid sites |                 | Strong acid sites |                 | Total acidity<br>(mmol/g) |
|--------|--------------------------------------------|-----------------|-----------------|-------------------|-----------------|---------------------------|
|        |                                            | Temp (°C)       | Amount (mmol/g) | Temp (°C)         | Amount (mmol/g) |                           |
| 1      | Nb <sub>2</sub> O <sub>5</sub> -400        | -               | -               | 637 (799)         | 0.109 (0.118)   | 0.227                     |
| 2      | Nb <sub>2</sub> O <sub>5</sub> -450        | -               | -               | 607               | 0.615           | 0.615                     |
| 3      | Nb <sub>2</sub> O <sub>5</sub> -500        | 232             | 0.070           | 648               | 0.015           | 0.085                     |
| 4      | Reused Nb <sub>2</sub> O <sub>5</sub> -450 | -               | -               | 608               | 0.468           | 0.468                     |

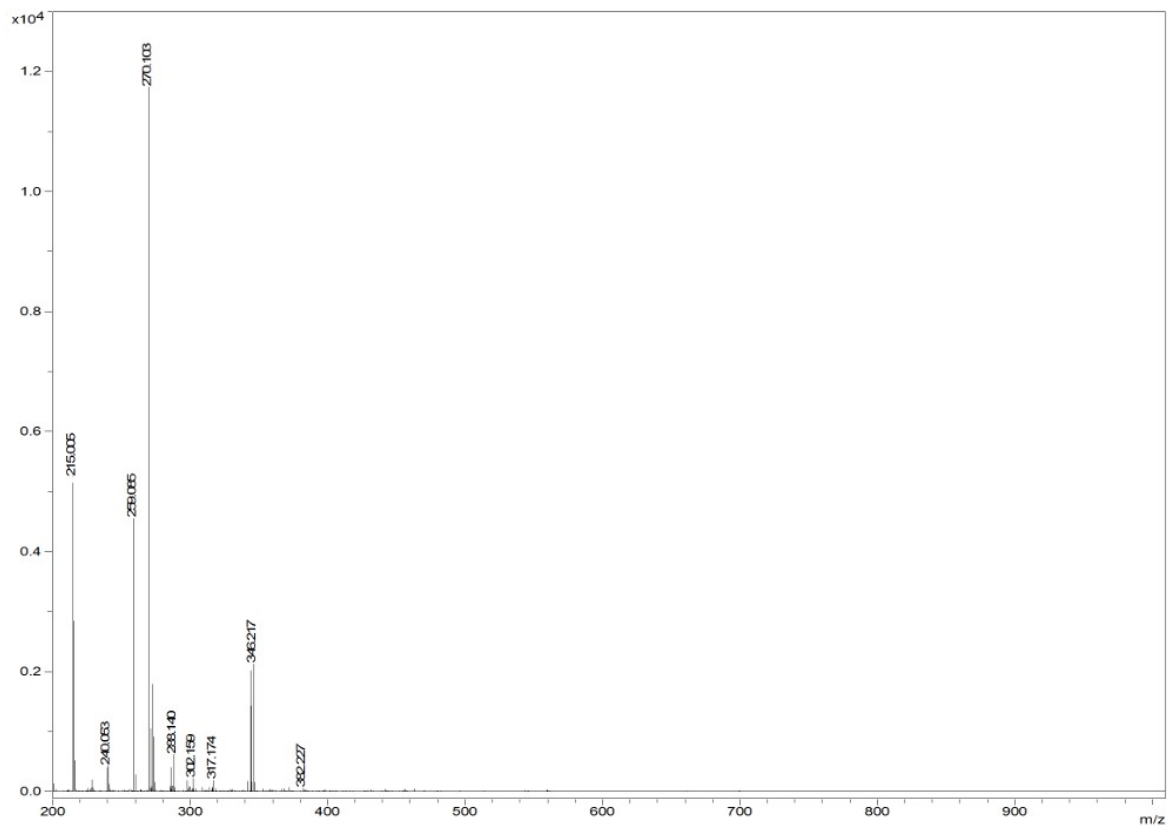

Fig. S2. MALDI-TOF spectra of PET aminolysis reaction mixture.

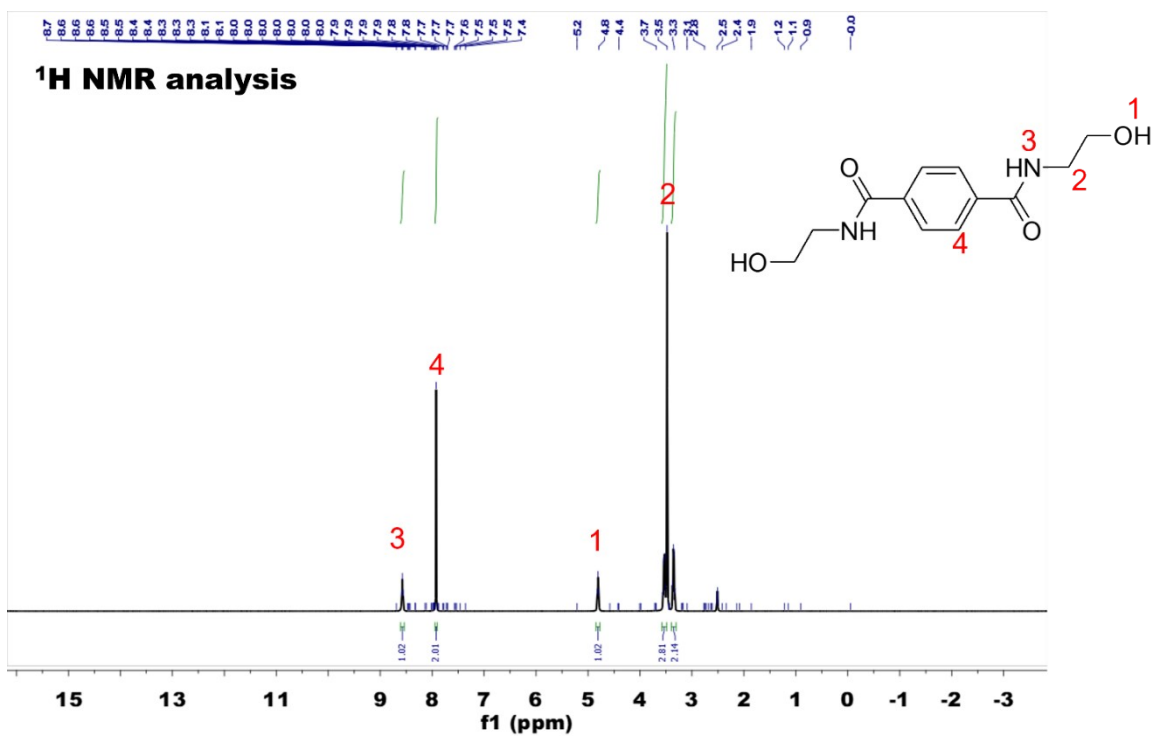

Fig. S3. <sup>1</sup>H NMR of BHETA monomer.



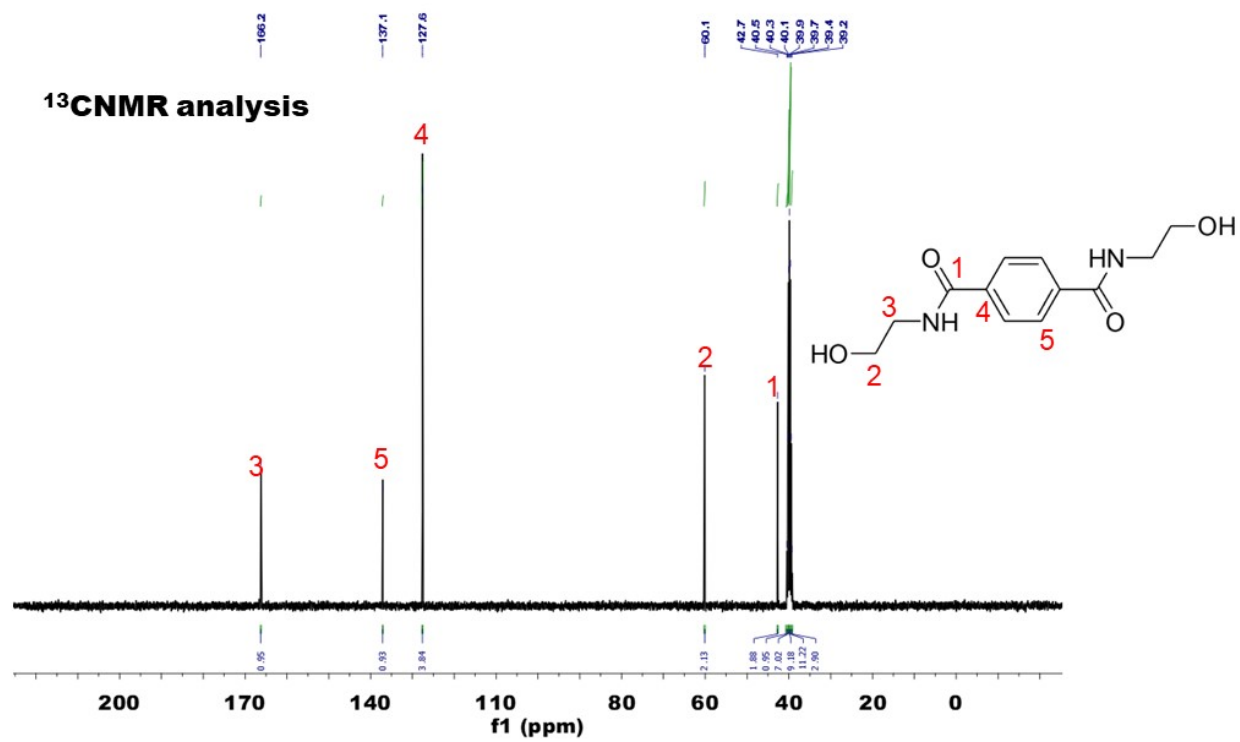

Fig. S4. <sup>13</sup>C NMR of BHETA monomer.

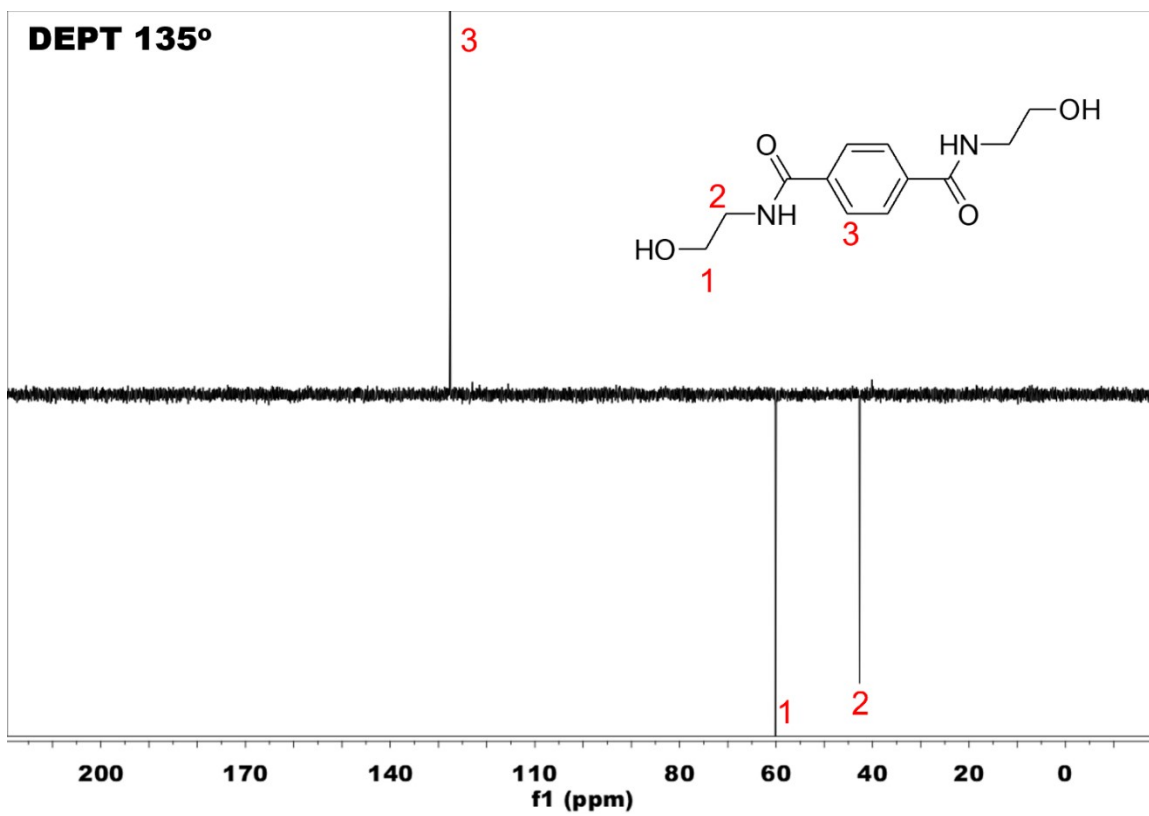

Fig. S5. DEPT analysis of BHETA monomer.

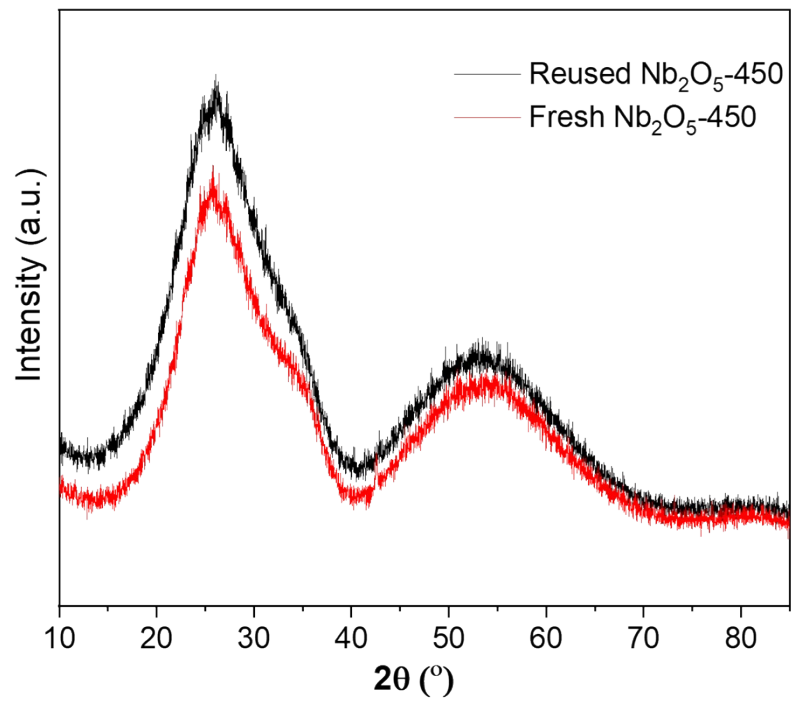

Fig. S6. Powder XRD analysis of fresh and reused Nb<sub>2</sub>O<sub>5</sub>-450 catalysts.

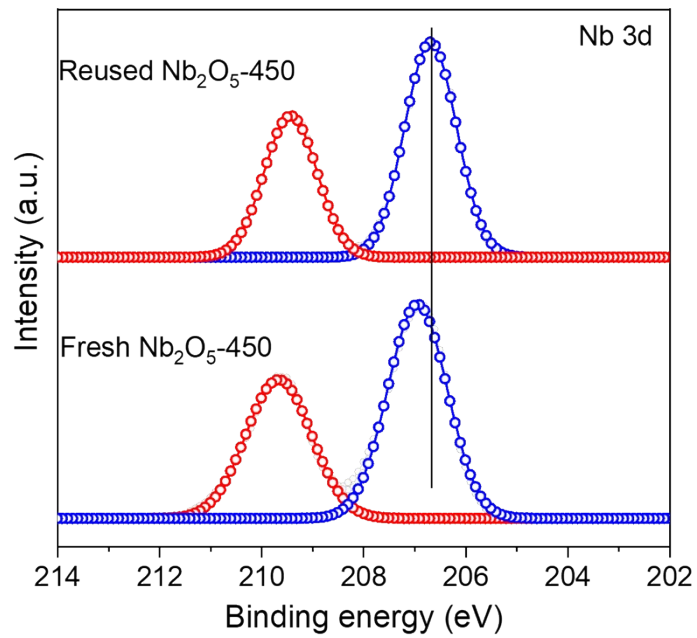

Fig. S7: Nb 3d XPS spectra of fresh and reused  $\text{Nb}_2\text{O}_5$ -450 catalysts.

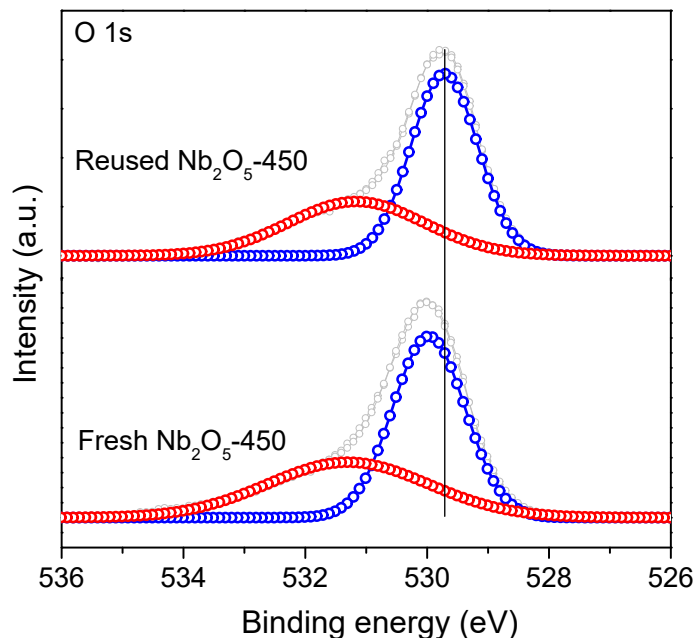

Fig. S8: O 1s XPS spectra of fresh and reused Nb<sub>2</sub>O<sub>5</sub>-450 catalysts.

## References

- (1) Mohammadi, S.; Bouldo, M. G.; Enayati, M. Controlled Glycolysis of Poly(Ethylene Terephthalate) to Oligomers under Microwave Irradiation Using Antimony(III) Oxide. *ACS Appl Polym Mater* **2023**, *5* (8), 6574–6584. <https://doi.org/10.1021/acsapm.3c01071>.
- (2) Viana, M. E.; Riul, A.; Carvalho, G. M.; Rubira, A. F.; Muniz, E. C. Chemical Recycling of PET by Catalyzed Glycolysis: Kinetics of the Heterogeneous Reaction. *Chemical Engineering Journal* **2011**, *173* (1), 210–219. <https://doi.org/10.1016/j.cej.2011.07.031>.
- (3) Kathalewar, M.; Dhopatkar, N.; Pacharane, B.; Sabnis, A.; Raut, P.; Bhave, V. Chemical Recycling of PET Using Neopentyl Glycol: Reaction Kinetics and Preparation of Polyurethane Coatings. *Prog Org Coat* **2013**, *76* (1), 147–156. <https://doi.org/10.1016/j.porgcoat.2012.08.023>.
- (4) Colombo, G.; Corredig, M.; Uysal Ünalán, I.; Tsochatzis, E. Untargeted Screening of NIAS and Cyclic Oligomers Migrating from Virgin and Recycled Polyethylene Terephthalate (PET) Food Trays. *Food Packag Shelf Life* **2024**, *41*, 101227. <https://doi.org/10.1016/j.fpsl.2023.101227>.
- (5) Colomines, G.; Robin, J.-J.; Tersac, G. Study of the Glycolysis of PET by Oligoesters. *Polymer (Guildf)* **2005**, *46* (10), 3230–3247. <https://doi.org/10.1016/j.polymer.2005.02.047>.
